# Supplementary material for: Comparative Platelet Releasate Proteomic Profiling of Acute Coronary Syndrome versus Stable Coronary Artery Disease
Source: Front Cardiovasc Med. 2020 Jun 24;7:101. doi: 10.3389/fcvm.2020.00101 (PMC7328343; doi:10.3389/fcvm.2020.00101)
Supplement: Supplementary file 2 [file Table_2.xlsx]

## Sheet: Supplementary Table 2
Pearson correlation analysis was performed on all proteins identified in the platelet releasate from 13 STEMI (termed STEMI_S in this correlation) patients in Perseus. Pearson r values for each pairwise comparison is indicated in the data matrix below. Average Pearson r value = 0.878 | standard deviation = 0.088 | minumum r value = 0.615 | maximum r value = 0.955
	STEMI_S_1	STEMI_S_10	STEMI_S_11	STEMI_S_12	STEMI_S_13	STEMI_S_14	STEMI_S_2	STEMI_S_4	STEMI_S_5	STEMI_S_6	STEMI_S_7	STEMI_S_8	STEMI_S_9
STEMI_S_1	NaN	0.723591	0.754594	0.890306	0.778599	0.86483	0.927666	0.706589	0.722667	0.751708	0.622661	0.787046	0.834304
STEMI_S_10	0.723591	NaN	0.891338	0.858948	0.916803	0.863804	0.706715	0.908612	0.921743	0.908085	0.908009	0.921618	0.930276
STEMI_S_11	0.754594	0.891338	NaN	0.890772	0.945924	0.88879	0.775324	0.904931	0.934262	0.943718	0.853771	0.948426	0.944292
STEMI_S_12	0.890306	0.858948	0.890772	NaN	0.899734	0.922478	0.888331	0.827509	0.85929	0.859819	0.770336	0.889811	0.941543
STEMI_S_13	0.778599	0.916803	0.945924	0.899734	NaN	0.906892	0.770618	0.916902	0.955051	0.954864	0.879705	0.94891	0.95258
STEMI_S_14	0.86483	0.863804	0.88879	0.922478	0.906892	NaN	0.881983	0.813971	0.874703	0.89319	0.780813	0.907909	0.941876
STEMI_S_2	0.927666	0.706715	0.775324	0.888331	0.770618	0.881983	NaN	0.663414	0.743201	0.764544	0.615292	0.7916	0.826994
STEMI_S_4	0.706589	0.908612	0.904931	0.827509	0.916902	0.813971	0.663414	NaN	0.920038	0.916362	0.920586	0.911593	0.892392
STEMI_S_5	0.722667	0.921743	0.934262	0.85929	0.955051	0.874703	0.743201	0.920038	NaN	0.97219	0.924178	0.954239	0.947376
STEMI_S_6	0.751708	0.908085	0.943718	0.859819	0.954864	0.89319	0.764544	0.916362	0.97219	NaN	0.900702	0.958051	0.940361
STEMI_S_7	0.622661	0.908009	0.853771	0.770336	0.879705	0.780813	0.615292	0.920586	0.924178	0.900702	NaN	0.893391	0.869199
STEMI_S_8	0.787046	0.921618	0.948426	0.889811	0.94891	0.907909	0.7916	0.911593	0.954239	0.958051	0.893391	NaN	0.957588
STEMI_S_9	0.834304	0.930276	0.944292	0.941543	0.95258	0.941876	0.826994	0.892392	0.947376	0.940361	0.869199	0.957588	NaN
