# Supplementary material for: Comparative Platelet Releasate Proteomic Profiling of Acute Coronary Syndrome versus Stable Coronary Artery Disease
Source: Front Cardiovasc Med. 2020 Jun 24;7:101. doi: 10.3389/fcvm.2020.00101 (PMC7328343; doi:10.3389/fcvm.2020.00101)
Supplement: Supplementary file 4 [file Table_4.xlsx]

## Sheet: Biological process
Analysis Type:		PANTHER Overrepresentation Test (release 2017_04)
Annotation Version and Release Date:		GO Ontology database; PANTHER v13.0
Analyzed List:		Client Text Box Input (Homo sapiens)
Reference List:		Homo sapiens (all genes in database)
Bonferroni correction:		TRUE
Bonferroni count:		8650
GO biological process		All genes in database	Enriched genes	Genes	Expected	Fold Enrichment	Enriched	p-value (Bonferroni corrected)
1. platelet degranulation	GO:0002576	127	4	SOD1; FN1; CLEC3B; F5	0.05	73.64	+	0.00141
2. regulated exocytosis	GO:0045055	686	6	HSP90AA1; SOD1; GPI; FN1; CLEC3B; F5	0.29	20.45	+	0.000801
3. exocytosis	GO:0006887	770	6	HSP90AA1; SOD1; GPI; FN1; CLEC3B; F5	0.33	18.22	+	0.00159
4. secretion by cell	GO:0032940	961	6	HSP90AA1; SOD1; GPI; FN1; CLEC3B; F5	0.41	14.6	+	0.00585
5. secretion	GO:0046903	1067	6	HSP90AA1; SOD1; GPI; FN1; CLEC3B; F5	0.46	13.15	+	0.0108
4. vesicle-mediated transport	GO:0016192	1787	7	HSP90AA1; SAA1; SOD1; GPI; FN1; CLEC3B; F5	0.76	9.16	+	0.0085
